# Supplementary material
Source: PubMed Central journal article supplement (PMC8254800)
Supplement: NIHMS1695630-supplement-1.pdf [file NIHMS1695630-supplement-1.pdf]

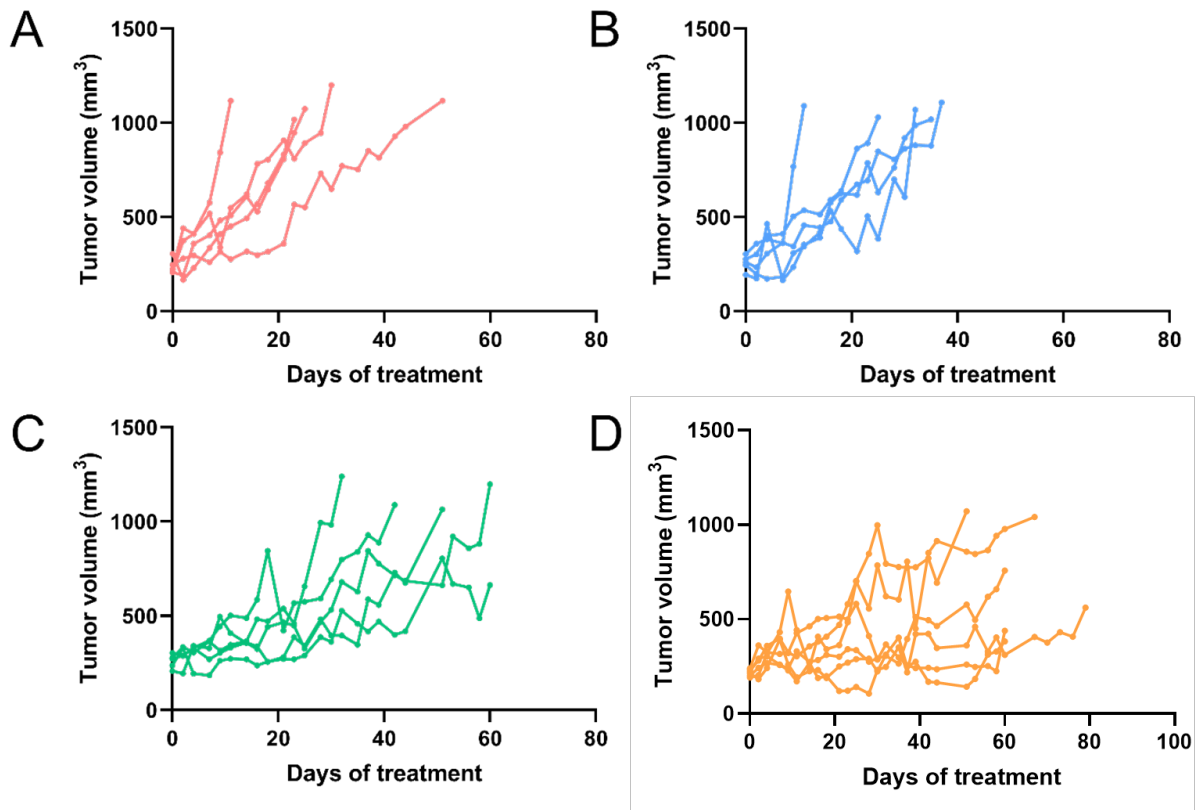

**Figure S1:** Individual VCaP-CR tumor growth curves in mice treated with (A) vehicle, (B) DMAPT, (C) castration or (D) DMAPT plus castration.
