# Supplementary material
Source: PubMed Central journal article supplement (PMC8254800)
Supplement: NIHMS1695630-supplement-2.pdf [file NIHMS1695630-supplement-2.pdf]

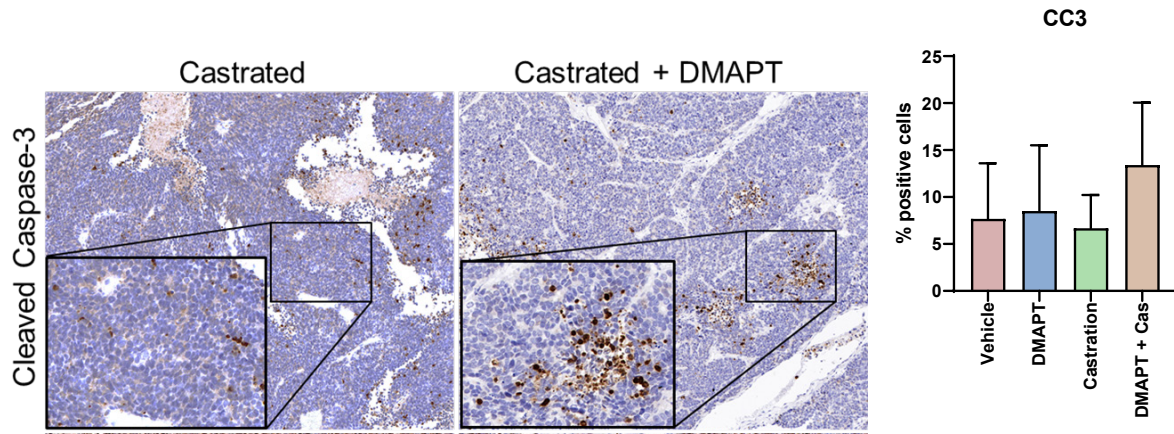

**Figure S2:** Cleaved caspase-3 IHC staining and quantification in VCaP-CR tumors (n = 6-8 mice per group, error bars  $\pm 1$ SEM).
