# Supplementary material
Source: PubMed Central journal article supplement (PMC8254800)
Supplement: NIHMS1695630-supplement-3.pdf [file NIHMS1695630-supplement-3.pdf]

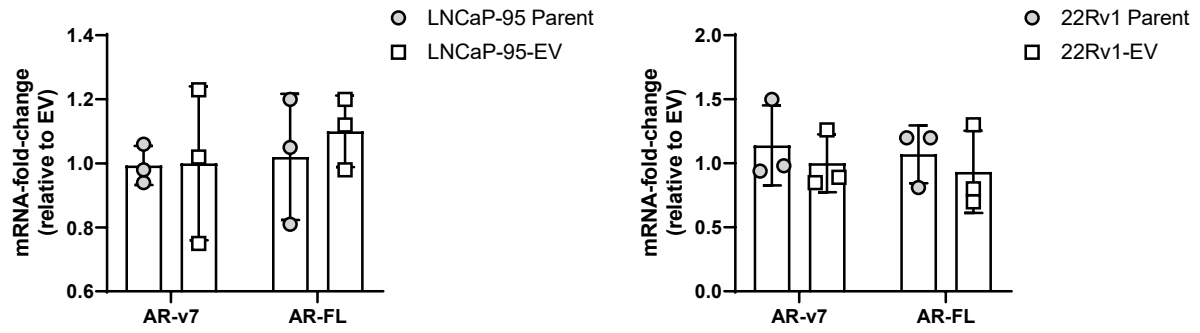

**Figure S3:** Comparison of AR-v7 and AR-FL mRNA expression in parental vs empty vector control (EV) cell lines (n=3,  $\pm 1SD$ ).
