# Supplementary material
Source: PubMed Central journal article supplement (PMC8254800)
Supplement: NIHMS1695630-supplement-4.pdf [file NIHMS1695630-supplement-4.pdf]

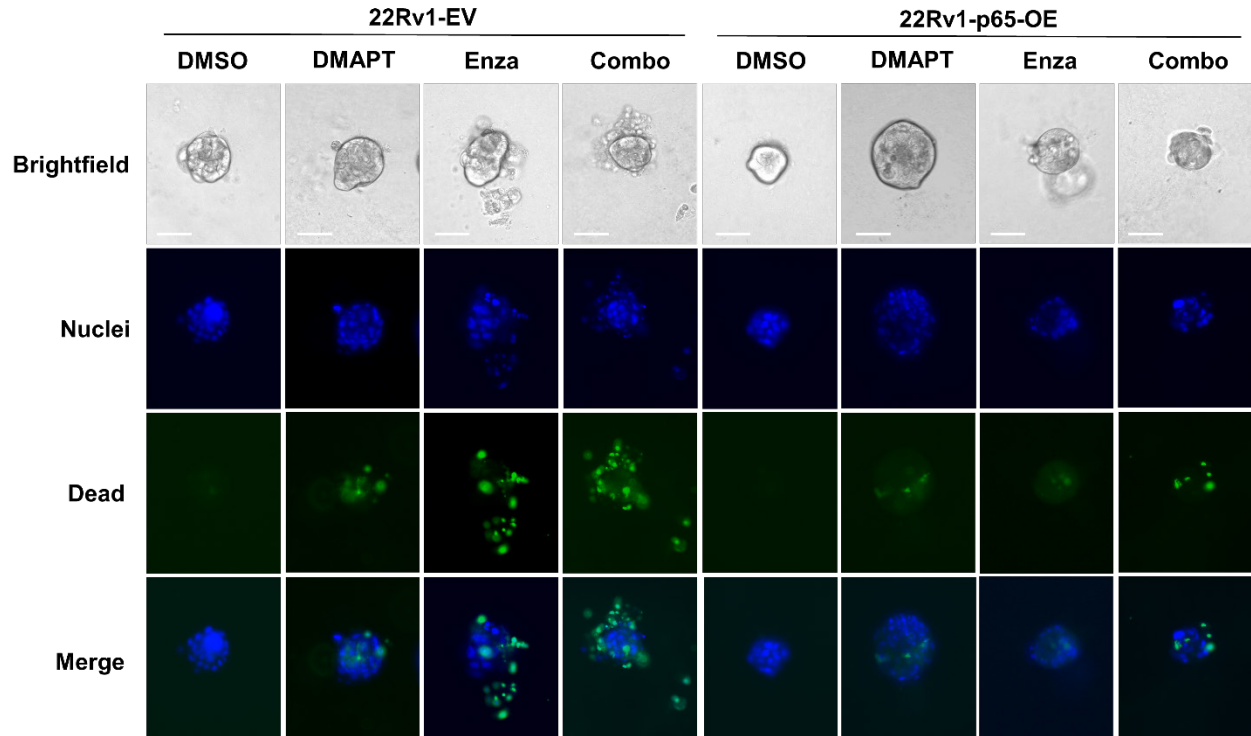

**Figure S4:** Representative images of cell death staining in 22Rv1 empty vector control (EV) and p65 overexpressing (p65-OE) tumoroids treated +/- DMAPT and/or enzalutamide.
