# Supplementary material
Source: PubMed Central journal article supplement (PMC8254800)
Supplement: NIHMS1695630-supplement-5.pdf [file NIHMS1695630-supplement-5.pdf]

**Table S1: qPCR primers**

| <b>Target</b> | <b>Forward</b>                    | <b>Reverse</b>             |
|---------------|-----------------------------------|----------------------------|
| FL human AR   | ACATCAAGGAACTCGATCGTATCATTGC      | TTGGGCACTTGCACAGAGAT       |
| AR-v7         | CCATCTTGTTCGTCTTCGGAAATGTTATGAAGC | TTTGAATGAGGCAAGTCAGCCTTTCT |
| FL mouse AR   | GGACCATGTTTTACCCATCG              | GGACCATGTTTTACCCATCG       |
| mAR-v2        | GGACCATGTTTTACCCATCG              | TTGTTGTGGCAGCAGAGTTC       |
| ETS2          | TGGCTTCAAAAAGGAACAGC              | CCTCTGCAGATTCACGTTCA       |
| EDN2          | TGGGTGAACACTCCTGAACA              | AGGCAGAAGGTGGCACAG         |
| KLK3          | TCCAATGACGTGTGTGCGCA              | CCTTGATCCACTTCCG GTAA      |
| FKPB5         | AAAAGGCCAAGGAGCACAAAC             | TTGAGGAGGGGCCGAGTTC        |
| B-actin       | TCATGAAGTGTGACGTTGACATCCGT        | CTTAGAAGCATTTGCGGTGCACGATG |
