# Supplementary material
Source: PubMed Central journal article supplement (PMC8254800)
Supplement: NIHMS1695630-supplement-6.pdf [file NIHMS1695630-supplement-6.pdf]

**Table S2: Antibodies**

| <b>Antibody</b>   | <b>Catalog #</b> | <b>Source</b>                | <b>Application</b> | <b>Concentration</b> |
|-------------------|------------------|------------------------------|--------------------|----------------------|
| phos-p65 (NF-kB)  | 3033             | Cell Signaling<br>Technology | WB<br>IHC          | 1:1000<br>1:100      |
| p65               | 8242             | Cell Signaling<br>Technology | WB                 | 1:1000               |
| GAPDH             | 12004168         | Bio-Rad                      | WB                 | 1:5000               |
| Ki-67             | MA5-14520        | Invitrogen                   | IHC                | 1:200                |
| Cleaved Caspase-3 | 9664             | Cell Signaling<br>Technology | IHC                | 1:200                |
| AR                | 5153             | Cell Signaling<br>Technology | WB<br>IHC          | 1:2000<br>1:500      |
| AR-v7             | ab198394         | Abcam                        | WB<br>IHC          | 1:1000<br>1:100      |
